# Supplementary material for: Rapid and sensitive detection of drugs of abuse in sweat by multiplexed capillary based immuno-biosensors
Source: Royal Society of Chemistry journal article supplement (doi:10.1039/c9an02498k), 2020-01-01
Supplement: c9an02498k1.pdf [file c9an02498k1.pdf]

## Supplementary Information for

### Rapid and sensitive detection of drugs of abuse in sweat by multiplexed capillary based immuno-biosensors

Wen Xue<sup>1</sup>, Xiaotian Tan<sup>1</sup>, Maung Kyaw Khaing Oo<sup>2</sup>, Girish Kulkarni<sup>3</sup>,  
Mark A. Ilgen<sup>4</sup>, and Xudong Fan<sup>1,\*</sup>

<sup>1</sup>Department of Biomedical Engineering, University of Michigan  
Ann Arbor, Michigan 48109, United States

<sup>2</sup>Optofluidic Bioassay, LLC, 674 South Wagner Road,  
Ann Arbor, Michigan 48103, United States

<sup>3</sup>Arborsense Inc., 1600 Huron Parkway,  
Ann Arbor, Michigan 48109, United States

<sup>4</sup>Department of Psychiatry, University of Michigan  
Ann Arbor, Michigan 48109, United States

\*[xsfan@umich.edu](mailto:xsfan@umich.edu)

Contents:

1. Figure S1 Picture of the cartridge.
2. Figure S2 Capillary arrangement for drug detection.
3. Table S1 Recovery rate of multiplexed drug detection with one drug absent.
4. Table S2 Recovery rate of multiplexed drug detection with mixed drug-HRP conjugates.

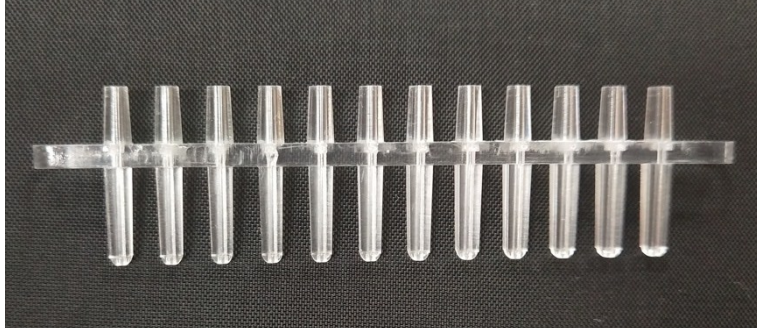

Figure S1. Picture of the cartridge.

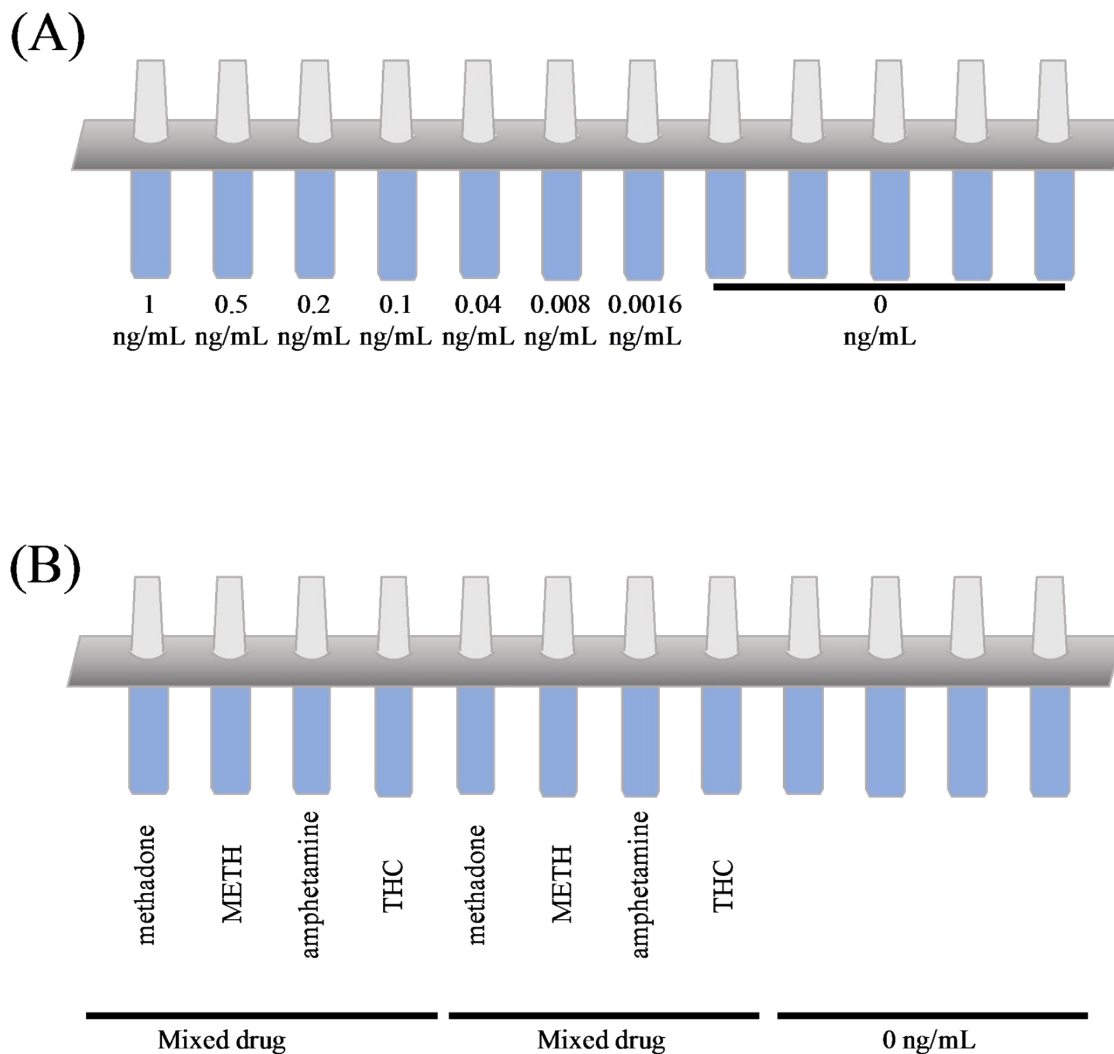

Figure S2. (A) Sensor arrangement in a cartridge (capillary array) to generate inhibition curves for individual drugs. Methadone was used as an example with serial concentrations from 0.0016 ng/mL to 1 ng/mL. All twelve capillaries were coated with the antibody against methadone, among which five capillaries were used to generate the blank signal. Three such cartridges were used for each drug to generate the corresponding error bars. (B) Sensor arrangement in a cartridge (capillary array) for multiplexed drug detection. Within a cartridge, two sets of four capillaries, each of which was coated with the corresponding antibody, were allocated to perform duplicate measurement of the same drug mixture. The remaining four capillaries were used to generate the blank signal. For each drug mixture, two such cartridges were used (for a total of four sets of four capillaries). The error bars are obtained from the four sets of measurements.

Table S1. Recovery rate of multiplexed drug detection with one drug absent

|                           | Drug        | Excepted<br>(Spiked)<br>(ng/mL) | Observed<br>(ng/mL) | Recovery<br>rate (%) | Average<br>d<br>recovery<br>rate (%) |
|---------------------------|-------------|---------------------------------|---------------------|----------------------|--------------------------------------|
| <b>High level</b>         | Methadone   | 0.6                             | 0.61±0.14           | 101.9                | 91.7                                 |
|                           | METH        | 18                              | 14.60±2.83          | 81.0                 |                                      |
|                           | Amphetamine | 0                               | 0                   | -                    |                                      |
|                           | THC         | 800                             | 738±5.70            | 92.2                 |                                      |
| <b>Intermediate level</b> | Methadone   | 0.06                            | 0.07±0.03           | 110.3                | 109.0                                |
|                           | METH        | 0                               | 0                   | -                    |                                      |
|                           | Amphetamine | 1.6                             | 1.77±0.38           | 110.6                |                                      |
|                           | THC         | 100                             | 106.20±2.92         | 106.2                |                                      |
| <b>Low level</b>          | Methadone   | 0                               | 0                   | -                    | 119.1                                |
|                           | METH        | 0.18                            | 0.21±0.03           | 116.6                |                                      |
|                           | Amphetamine | 0.16                            | 0.20±0.02           | 121.3                |                                      |
|                           | THC         | 0.1                             | 0.12±0.01           | 119.3                |                                      |
| <b>Intermediate level</b> | Methadone   | 0.5                             | 0.61±0.05           | 122.0                | 96.1                                 |
|                           | METH        | 10                              | 8.12±0.22           | 81.2                 |                                      |
|                           | Amphetamine | 3                               | 2.56±0.31           | 85.2                 |                                      |
|                           | THC         | 0                               | 0                   | -                    |                                      |

Table S2. Recovery rate of multiplexed drug detection with mixed drug-HRP conjugates

|                           | Drug        | Excepted<br>(Spiked)<br>(ng/mL) | Observed<br>(ng/mL) | Recovery<br>(%) | Average<br>d<br>recovery<br>rate (%) |
|---------------------------|-------------|---------------------------------|---------------------|-----------------|--------------------------------------|
| <b>High level</b>         | Methadone   | 0.5                             | 0.35±0.06           | 70.0            | 71.9                                 |
|                           | METH        | 10                              | 5.23±1.27           | 52.3            |                                      |
|                           | Amphetamine | 3                               | 2.17±0.31           | 72.3            |                                      |
|                           | THC         | 500                             | 463.70±4.90         | 92.8            |                                      |
| <b>Intermediate level</b> | Methadone   | 0.05                            | 0.06±0.02           | 127.4           | 125.7                                |
|                           | METH        | 1                               | 1.43±0.32           | 142.5           |                                      |
|                           | Amphetamine | 0.3                             | 0.41±0.11           | 135.3           |                                      |
|                           | THC         | 50                              | 48.80±3.54          | 97.6            |                                      |
| <b>Low level</b>          | Methadone   | 0.006                           | 0.01±0.01           | 118.3           | 139.8                                |
|                           | METH        | 0.18                            | 0.24±0.03           | 133.2           |                                      |
|                           | Amphetamine | 0.16                            | 0.20±0.02           | 127.5           |                                      |
|                           | THC         | 0.1                             | 0.18±0.03           | 180.0           |                                      |
